# Supplementary material for: Patterns of Nucleotide Diversity at the Regions Encompassing the Drosophila Insulin-Like Peptide (dilp) Genes: Demography vs. Positive Selection in Drosophila melanogaster
Source: PLOS journal article supplement (doi:10.1371/journal.pone.0053593), 2013-01-07
Supplement: S7 (10.1371/journal.pone.0053593.s007) [file journal.pone.0053593.s007]

Nucleotide polymorphism and divergence at the X-linked *dilp6* and *dilp7* gene regions

|                         | 3'    | <i>dilp6</i> | 5'    | <i>dilp7</i> |
|-------------------------|-------|--------------|-------|--------------|
| <b>No. sites</b>        |       |              |       |              |
| Intronic                | n. a. | 870          | n. a. | 170          |
| Synonymous              | n. a. | 75.8         | n. a. | 112.1        |
| Silent                  | 766   | 1312.8       | 29    | 334.1        |
| Non-synonymous          | n. a. | 245.2        | n. a. | 364.9        |
| Total                   | 766   | 1558         | 29    | 669          |
| <b><i>S</i></b>         |       |              |       |              |
| Intronic                | n. a. | 18 (10)      | n. a. | 5 (0)        |
| Synonymous              | n. a. | 0            | n. a. | 6 (4)        |
| Silent                  | 4 (1) | 22 (11)      | 1 (1) | 13 (5)       |
| Non-synonymous          | n. a. | 1 (1)        | n. a. | 1 (1)        |
| Total                   | 4 (1) | 23 (12)      | 1 (1) | 14 (6)       |
| <b><math>\pi</math></b> |       |              |       |              |
| Intronic                | n. a. | 0.006        | n. a. | 0.01         |
| Synonymous              | n. a. | 0            | n. a. | 0.012        |
| Silent                  | 0.002 | 0.005        | 0.006 | 0.011        |
| Non-synonymous          | n. a. | 0.0007       | n. a. | 0.0005       |
| Total                   | 0.002 | 0.004        | 0.006 | 0.005        |
| <b><i>h</i></b>         | 6     | 11           | 2     | 9            |
| <b><i>Hd</i></b>        | 0.85  | 0.98         | 0.17  | 0.91         |
| <b><i>K</i></b>         |       |              |       |              |
| Intronic                | n. a. | 0.062        | n. a. | 0.166        |
| Synonymous              | n. a. | 0.177        | n. a. | 0.118        |
| Silent                  | 0.043 | 0.071        | n. a. | 0.164        |
| Non-synonymous          | n. a. | 0.021        | n. a. | 0.010        |
| Total                   | 0.043 | 0.062        | n. a. | 0.073        |

*S*, number of segregating sites (number of singletons in parentheses);  $\pi$ , nucleotide diversity; *h*, number of haplotypes; *Hd*, haplotype diversity; *K*, nucleotide divergence; n. a., not applicable.
